# Supplementary material for: Efficient Gene Silencing in Brain Tumors with Hydrophobically Modified siRNAs
Source: Oxford University Press journal article supplement (doi:10.1158/1535-7163.mct-17-1144), 2018-04-13
Supplement: 15357163mct171144-sup-192605_2_supp_4610034_p568h4.docx [file 15357163mct171144-sup-192605_2_supp_4610034_p568h4.docx]

**Efficient gene silencing in brain tumors with hydrophobically modified siRNAs**

**Maire F. Osborn1,2,*, Andrew H. Coles1,2,*, Diane Golebiowski3,4**†**, Dimas Echeverria1,2,Michael P. Moazami1,5, Jonathan K. Watts1,5, Miguel Sena-Esteves3,4,#, and Anastasia Khvorova1,2,#**

1RNA Therapeutics Institute, University of Massachusetts Medical School, Worcester, MA, USA

2Program in Molecular Medicine, University of Massachusetts Medical School, Worcester, MA, USA

3Department of Neurology, University of Massachusetts Medical School, Worcester, MA, USA

4Horae Gene Therapy Center, University of Massachusetts Medical School, Worcester, MA, USA

5Department of Biochemistry and Molecular Pharmacology, University of Massachusetts Medical School, Worcester, MA, USA

***These authors contributed equally to this work**

†Present address: Solid GT, Cambridge, MA

#Co-corresponding authors. Email: Miguel.Esteves@umassmed.edu or Anastasia.Khvorova@umassmed.edu. Phone: (774) 455-3638 (A.K.) or 508-856-4412

(M.S-E.). Fax: 508-856-6696

**Supporting Information**

**Fig. S1.** Neurosphere viability following Chol-hsiRNA treatment. GBM8 neurospheres were treated with 0-5 µM Chol-hsiRNA for 72 h. Cell viability was measured via alamarBlue cell viability assay and presented as percent of untreated control (n = 3 biological replicates, mean +/- SD, see Supplemental Methods).

**Table S1.**

**Table S2.**

**Supplemental Methods**

**alamarBlue® cellular viability assay**

GBM8 cell viability following Chol-hsiRNA administration was assessed by the alamarBlue® (Life Technologies) assay, a fluorescence-based protocol that measures metabolism in proliferating cells. GBM8 neurospheres were treated with 0–5 μM Chol-hsiRNA for 72 h in a 96-well plate. Cells were then incubated for 0–2.5 h with fresh medium containing 10% alamarBlue. Absorbance at 570 and 600 nm was measured with a Tecan Infinite M200 microplate reader after 2 h. Cellular viability was calculated according to the manufacturer's protocol and normalized to an untreated control (n = 3 biological replicates, mean ± SD).
